# Supplementary material for: Comparative study of Janus B2XY (X, Y = S, Se, Te) and F-BNBN-H monolayers for water splitting: revealing the positive and negative roles of the intrinsic dipole
Source: Royal Society of Chemistry journal article supplement (doi:10.1039/d2cp03069a), 2022-01-01
Supplement: d2cp03069a1.pdf [file d2cp03069a1.pdf]

## Supporting Information (SI)

### **Comparative Study of Janus B<sub>2</sub>XY (X, Y=S, Se, Te) and F-BNBN-H Monolayers for Water Splitting: Reveal the Positive and Negative Roles of Intrinsic Dipole**

Xiao-Jun Yan<sup>#1,2</sup> Wen-Yuan Li<sup>#1,2</sup>, Guo-Ting Nan<sup>1,2</sup>, Xing Zou<sup>1</sup>, Li-Li, Liu<sup>3</sup>, Anrong Wang<sup>1</sup>, Shi-Fa Wang<sup>1</sup>, Yong Wei<sup>1</sup>, Chun-Ming Yang<sup>3</sup>, and Lei Hu\*<sup>1</sup>

1. College of Electronic and Information Engineer, Chongqing Three Gorges University, Chongqing, 404100, China

2. College of Computer science and Engineering, Chongqing Three Gorges University, Chongqing, 404100, China

3. College of Teacher Education, Chongqing Three Gorges University, Chongqing, 404100, China

4. College of Chemistry and Chemistry Engineering, Yan'an University, Shaanxi Key Laboratory of Chemical Reaction Engineering, Yan'an 716000, China

### SI-1 The magnetic properties of B<sub>2</sub>XY monolayers

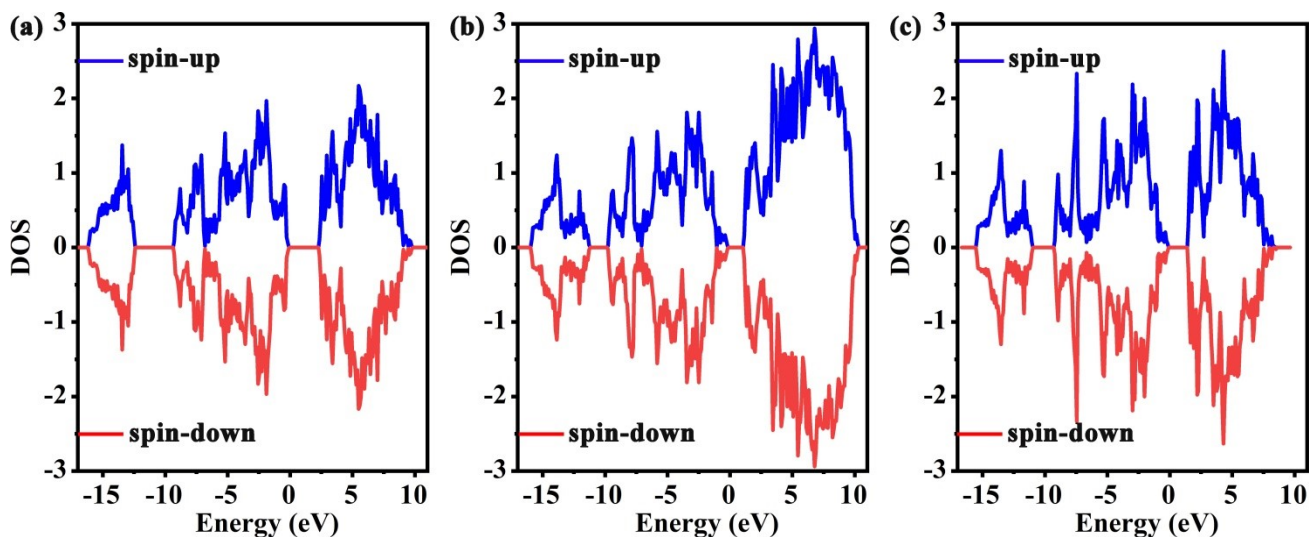

**Figure S1** The electronic states of spin-up and spin-down channels for B<sub>2</sub>SSe, B<sub>2</sub>STe and B<sub>2</sub>SeTe monolayers.

The spin-polarized calculations (ISPIN=2) are performed to identify the magnetic properties of B<sub>2</sub>XY monolayers. As shown in **Figure S1a-c**, the electronic states in spin-up and spin-down channels are completely symmetric with respect to the zero level, which demonstrates that B<sub>2</sub>XY monolayers are non-magnetic.

### SI-2 The VBM and CBM charge density of the B<sub>2</sub>STe monolayer

The reason for the disappearing VBM charge density of the B<sub>2</sub>STe monolayer is that the isosurface value is set as large as 0.0075 e·Bohr<sup>-3</sup> in **Figure 3** of our main manuscript. As shown in **Figure S2**, when the isosurface is reset as 0.0011 e·Bohr<sup>-3</sup>, the VBM of the B<sub>2</sub>STe monolayer is more visualized and mainly distributed at the top surface.

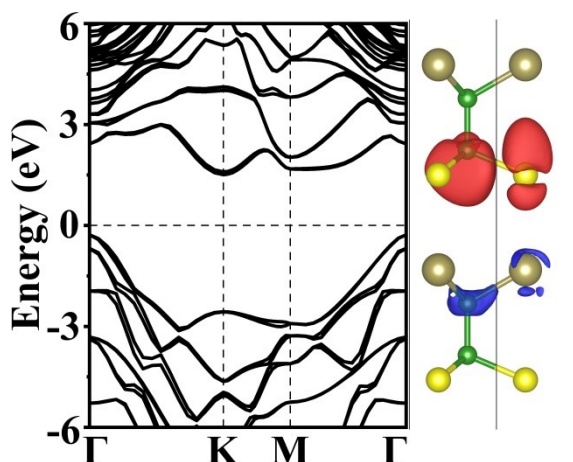

**Figure S2** The CBM and VBM charge density of the B<sub>2</sub>STe monolayer. The isosurface value is taken as 0.0011 e·Bohr<sup>-3</sup>.

**SI-3** The band structure, VBM and CBM levels with the Fermi level not reset

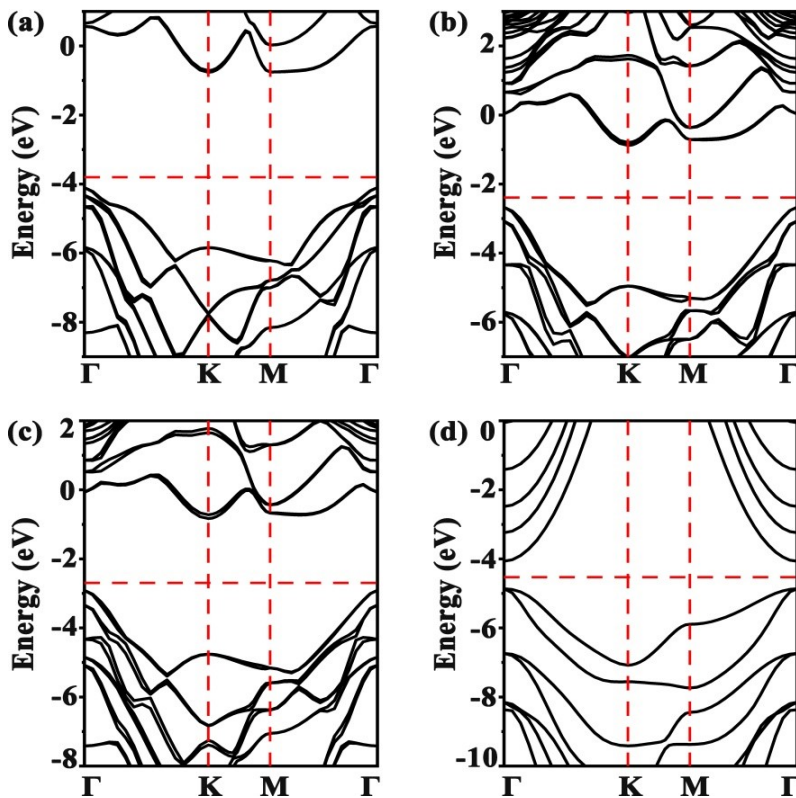

**Figure S3** The band structures of (a) B<sub>2</sub>SSe, (b) B<sub>2</sub>STe and (c) B<sub>2</sub>SeTe monolayers at the HSE06+SOC level; (d) The band structure of the F-BNBN-H monolayer at the HSE06 level, with fermi level not reset.

**Table S1.** The CBM, VBM and Fermi levels of B<sub>2</sub>XY and F-BNBN-H monolayers directly extracted from the VASP outcome, with fermi level not reset.

| Species             | $E_{CBM}$ | $E_{VBM}$ | $E_{Fermi}$ |
|---------------------|-----------|-----------|-------------|
| B <sub>2</sub> SSe  | -0.75     | -4.10     | -3.80       |
| B <sub>2</sub> STe  | -0.81     | -2.65     | -2.38       |
| B <sub>2</sub> SeTe | -0.83     | -2.92     | -2.69       |
| F-BNBN-H            | -4.06     | -4.86     | -4.53       |

#### SI-4 The band alignment of B<sub>2</sub>XY and F-BNBN-H monolayers calculated by shifting the redox potentials of water

As shown in **Figure S4a-d**, the band alignments of B<sub>2</sub>XY and F-BNBN-H monolayers are also obtained by shifting the redox potentials [1, 2]. For B<sub>2</sub>XY monolayers, their CBM is located on the bottom (00 $\bar{1}$ ) surface, while their VBM is distributed on the top surface. The CBMs of B<sub>2</sub>XY monolayers are higher than the shifted reduction potential of water for the bottom (00 $\bar{1}$ ) surface. The VBM of B<sub>2</sub>SSe monolayer is just below the shifted oxidation potential of water for the top (001) surface, and thus the B<sub>2</sub>SSe monolayer has very limited photocatalytic ability. The VBMs of B<sub>2</sub>STe and B<sub>2</sub>SeTe monolayers are higher than the shifted oxidation potential of water for the top (001) surface, which indicates the vanishing photocatalytic ability for B<sub>2</sub>STe and B<sub>2</sub>SeTe monolayers. Summarily, the B<sub>2</sub>SSe monolayer has limited photocatalytic ability, while B<sub>2</sub>STe and B<sub>2</sub>SeTe monolayers possess no photocatalytic ability.

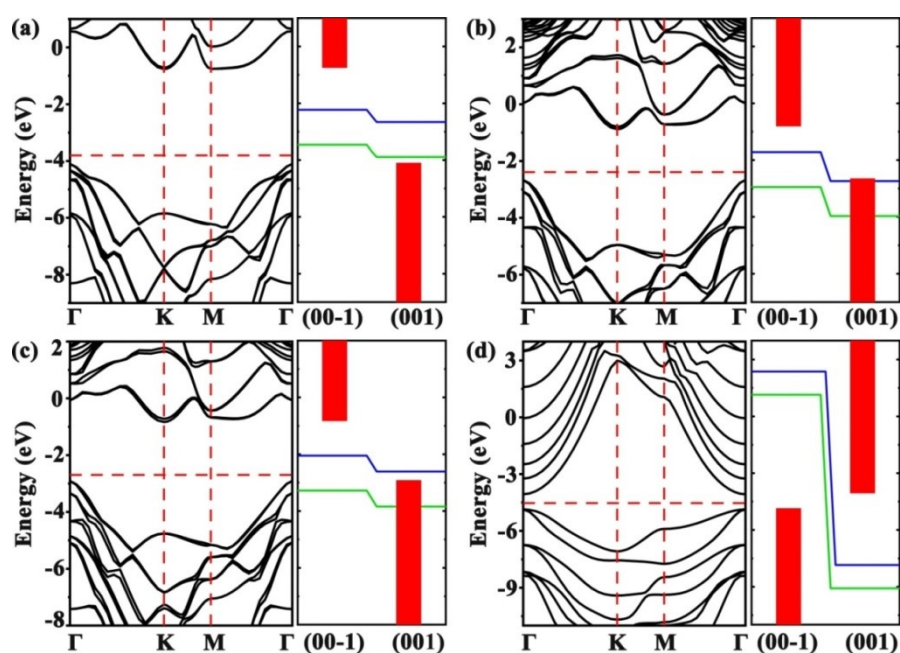

**Figure S4** The band alignment of (a) B<sub>2</sub>SSe, (b) B<sub>2</sub>STe, (c) B<sub>2</sub>SeTe and (d) F-BNBN-H monolayers calculated by shifting the redox potential of water. The blue lines indicate the shifted reduction potential of water, while the green lines represent the shifted oxidation potential of water.

On the other side, the CBM of F-BNBN-H monolayer is much higher than the shifted reduction potential of water for the top (001) surface, and the VBM is much lower than the shifted reduction potential of water for the bottom (00 $\bar{1}$ ) surface. Hence, the F-BNBN-H monolayer has good

photocatalytic ability for water splitting. These analyses are well agreement with that in the main manuscript.

### **Reference**

[1] C.F. Fu, J. Sun, Q. Luo, X. Li, W. Hu, J. Yang, Intrinsic Electric Fields in Two-dimensional Materials Boost the Solar-to-Hydrogen Efficiency for Photocatalytic Water Splitting, **Nano Lett.** 18 (2018) 6312.

[2] G. Wang, W. Tang, W. Xie, Q. Tang, Y. Wang, H. Guo, P. Gao, S. Dang, J. Chang, Type-II CdS/PtSSe heterostructures used as highly efficient water-splitting photocatalysts, **Appl. Surf. Sci.** 589 (2022) 152931.
